# Supplementary material for: Human Papillomavirus (HPV) Self-Sampling among Never-and Under-Screened Indigenous Māori, Pacific and Asian Women in Aotearoa New Zealand: A Feasibility Study
Source: MDPI journal article supplement (doi:10.3390/ijerph181910050), 2021-09-24

### Supplementary File 6: Flowchart

Management of women during the HPV self-sampling feasibility study.

From Bromhead et al., Human papillomavirus (HPV) self-sampling among never- and under-screened Indigenous Māori, Pacific and Asian women in Aotearoa New Zealand: A Feasibility Study.

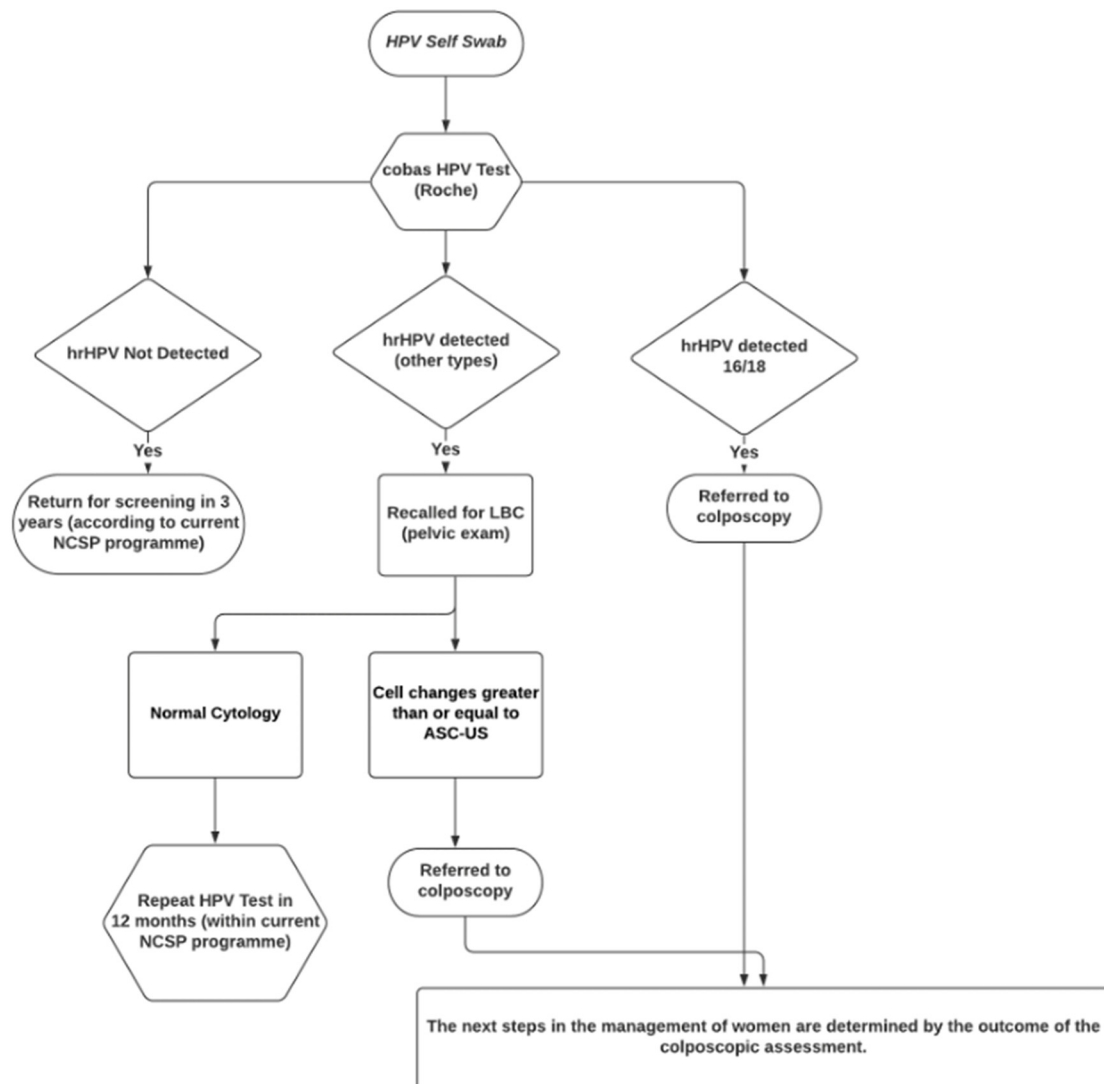

Supplement: s1 [file s1]
